# Supplementary material for: Metabolic excretion associated with nutrient–growth dysregulation promotes the rapid evolution of an overt metabolic defect
Source: PubMed Central journal article supplement (PMC7470746; doi:10.1371/journal.pbio.3000757), 2020-08-24
Supplement: pbio.3000757.s036.pdf [file pbio.3000757.s036.pdf]

| WY2520 (lys-met-) |       |   |   |   |   |       |   |   |   |       |   |   | WY2521 (lys-), 8 hrs |   |   |   |   |          |
|-------------------|-------|---|---|---|---|-------|---|---|---|-------|---|---|----------------------|---|---|---|---|----------|
|                   | 24 hr |   |   |   |   | 48 hr |   |   |   | 72 hr |   |   |                      |   |   |   |   |          |
| lys               | +     | + | - | - | + | +     | - | - | + | +     | - | - | +                    | + | - | + | - | lys      |
| orgS              | +     | + | + | - | - | +     | + | - | - | +     | + | - | -                    | + | + | - | - | orgS     |
| nitrogen          | +     | - | + | + | + | -     | + | + | + | -     | + | + | +                    | + | + | - | - | nitrogen |

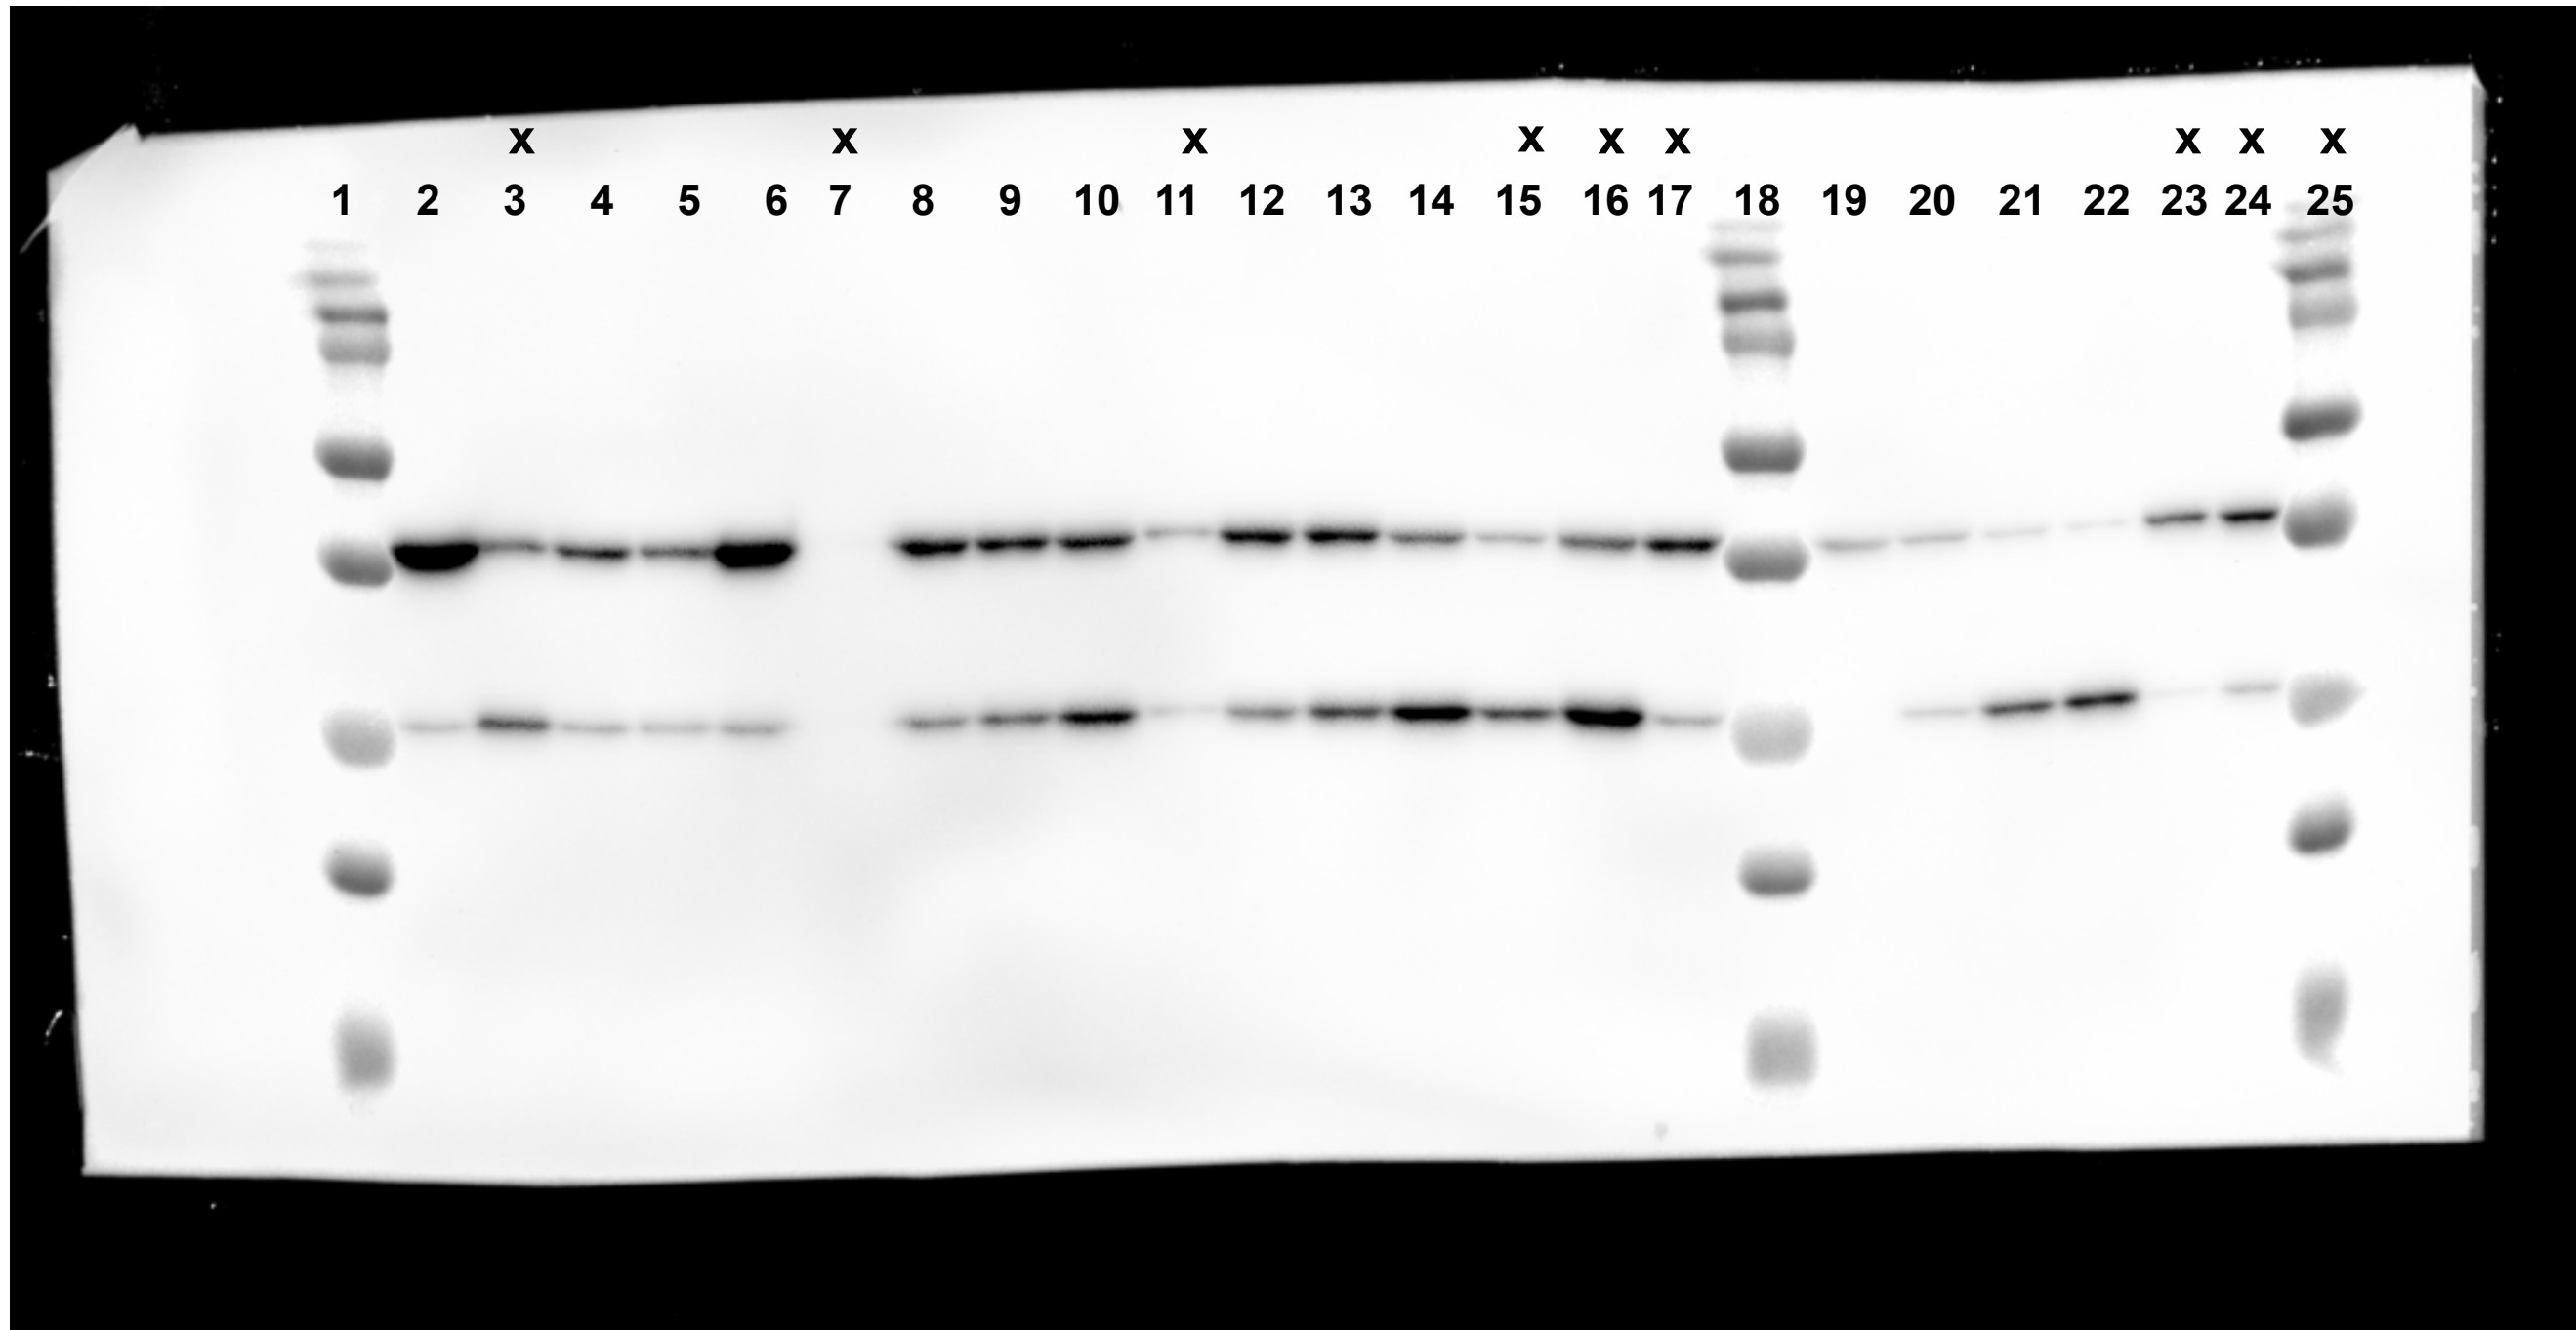

Lanes 18-22 from this blot were used in Fig 2B

18: Molecular weight ladder

19: exponential WY2521 before starvation

20: WY2521 starved only for lysine for 8 hours

21: WY2521 starved only for nitrogen for 8 hours

22: WY2521 starved for both lysine and nitrogen for 8 hours

Band intensities from lanes 1-14 excluding those marked with an "x" were used for analysis plotted in S12A Fig and provided in S16 Data

1,18: Molecular weight ladder

2: exponential WY2520 before starvation

4,8,12: WY2520 starved of lysine for 24, 48 and 72 hours, respectively

5,9,13: WY2520 starved of both lysine and organosulfurs for 24, 48 and 72 hours, respectively

6,10,14: WY2520 starved only of organosulfurs for 24, 48 and 72 hours, respectively

The detailed protocol is provided under "Autophagy Assay" in Methods

TCA-precipitated cell lysates from *S. cerevisiae* were loaded in each lane

Blots were treated with anti-GFP (JL-8) primary and HRP-conjugated anti-mouse secondary

Image is an overlay of the colorimetric image of the protein ladder and chemiluminescence imaging of the stained protein bands



gel date: 2020-03-03

|          | replicate 1 |   |   |   |   | replicate 2 |   |   |   |   | replicate 3 |   |   |   |   |          |
|----------|-------------|---|---|---|---|-------------|---|---|---|---|-------------|---|---|---|---|----------|
| lys      | +           | - | - | + | + | +           | - | - | + | + | +           | - | - | + | + | lys      |
| orgS     | +           | + | - | - | + | +           | + | - | - | + | +           | + | - | - | + | orgS     |
| nitrogen | +           | + | + | + | - | +           | + | + | + | - | +           | + | + | + | - | nitrogen |

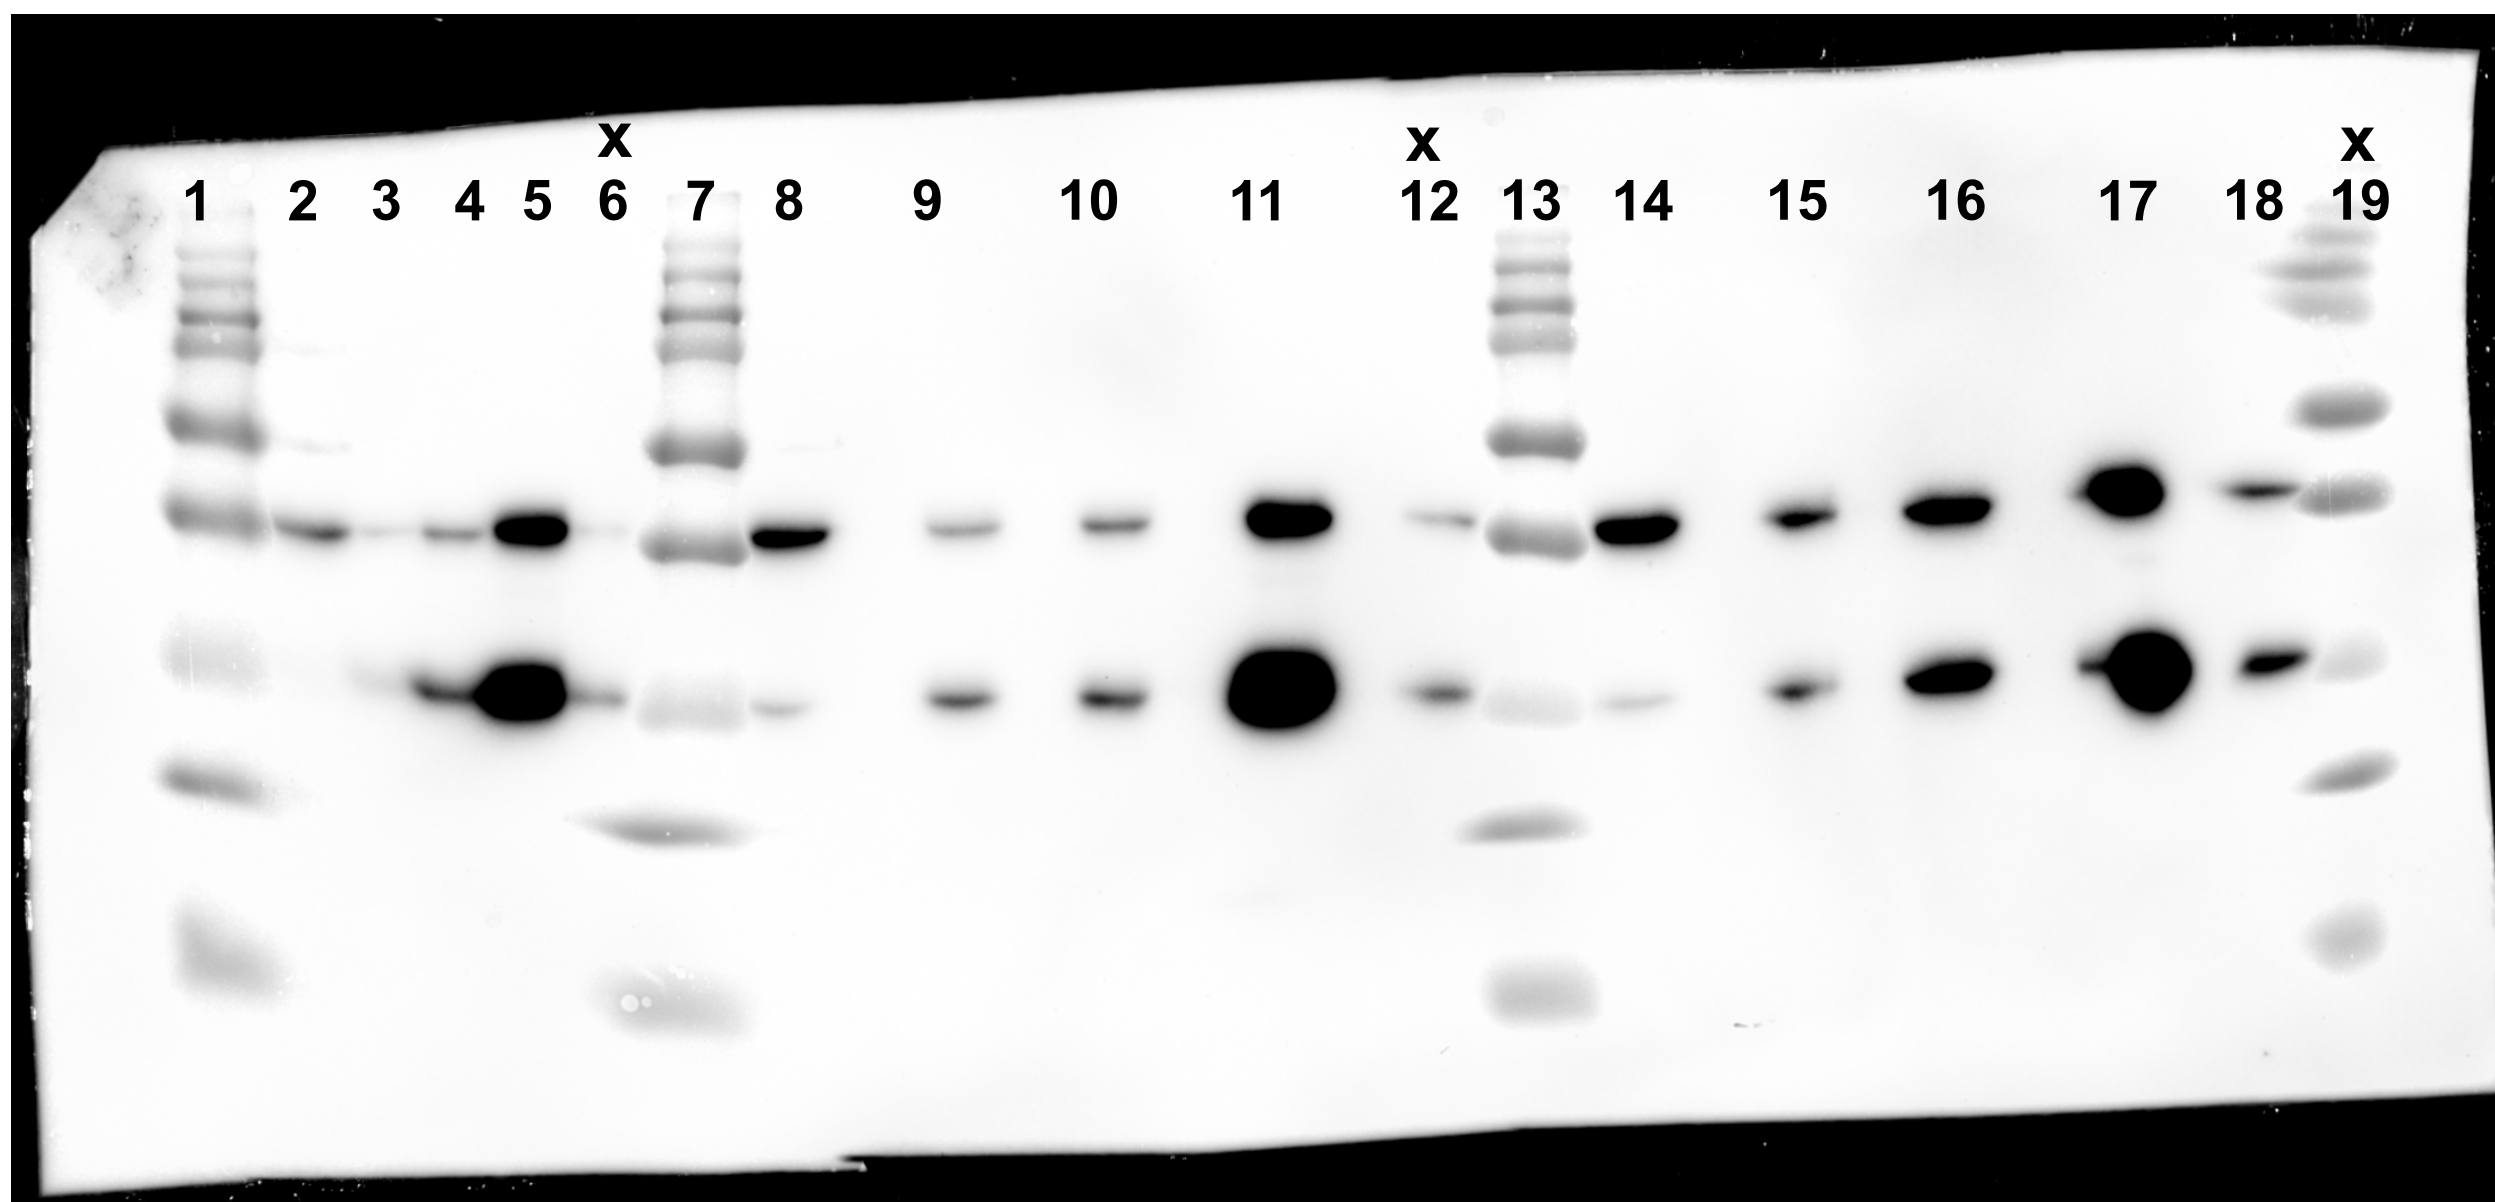

**Band intensities from all lanes except those marked with an "x" were used for analysis plotted in S12B-C Figs and provided in S16 Data.**

1,7,13,19: Molecular weight ladder

2,8,14: exponential WY2520 before starvation

3,9,15: WY2520 starved of lysine for 72 hours

4,10,16: WY2520 starved of both lysine and organosulfurs for 72 hours

5,11,17: WY2520 starved only of organosulfurs for 72 hours

The detailed protocol is provided under "Autophagy Assay" in Methods

TCA-precipitated cell lysates from *S. cerevisiae* were loaded in each lane

Blots were treated with anti-GFP (JL-8) primary and HRP-conjugated anti-mouse secondary

Image is an overlay of the colorimetric image of the protein ladder and chemiluminescence imaging of the stained protein bands
